# Supplementary material for: Peptide-conjugated phosphodiamidate oligomer-mediated exon skipping has benefits for cardiac function in mdx and Cmah-/-mdx mouse models of Duchenne muscular dystrophy
Source: PubMed Central journal article supplement (PMC6005479; doi:10.1371/journal.pone.0198897), 2018-06-18
Supplement: pone.0198897.s001.pdf [file pone.0198897.s001.pdf]

**S1 Table: Body mass of mice at the end of study 1 (32 weeks).**

|                             | <b>End body mass<br/>(g) (<math>\pm</math>S.E.M)</b> |
|-----------------------------|------------------------------------------------------|
| <b><i>C57BL10</i></b>       | 36.8 ( $\pm$ 0.7)                                    |
| <b><i>mdx</i></b>           | 36.6 ( $\pm$ 0.3)                                    |
| <b><i>mdx Pip6a-PMO</i></b> | 35.7 ( $\pm$ 1.0)                                    |
