# Supplementary material for: Peptide-conjugated phosphodiamidate oligomer-mediated exon skipping has benefits for cardiac function in mdx and Cmah-/-mdx mouse models of Duchenne muscular dystrophy
Source: PubMed Central journal article supplement (PMC6005479; doi:10.1371/journal.pone.0198897), 2018-06-18
Supplement: pone.0198897.s002.pdf [file pone.0198897.s002.pdf]

**S2 Table: Body mass of mice at end of study 2 (28 weeks) (\*P<0.05 compared to C57BL10).**

|                                               | <b>End body mass<br/>(g) (<math>\pm</math>S.E.M)</b> |
|-----------------------------------------------|------------------------------------------------------|
| <b><i>C57BL10</i></b>                         | 38.6 ( $\pm$ 1.2)                                    |
| <b><i>mdx</i></b>                             | 35.6 ( $\pm$ 0.8)                                    |
| <b><i>Cmah<sup>-/-</sup>mdx</i></b>           | 33.7 ( $\pm$ 1.3)*                                   |
| <b><i>Cmah<sup>-/-</sup>mdx Pip6a-PMO</i></b> | 33.4 ( $\pm$ 1.3)*                                   |
