# Supplementary material for: Peptide-conjugated phosphodiamidate oligomer-mediated exon skipping has benefits for cardiac function in mdx and Cmah-/-mdx mouse models of Duchenne muscular dystrophy
Source: PubMed Central journal article supplement (PMC6005479; doi:10.1371/journal.pone.0198897), 2018-06-18
Supplement: pone.0198897.s003.pdf [file pone.0198897.s003.pdf]

**S3 Table: Heart mass at end of study 2 (28 weeks)**

|                                               | <b>End heart mass (mg) (<math>\pm</math>S.E.M)</b> |
|-----------------------------------------------|----------------------------------------------------|
| <b><i>C57BL10</i></b>                         | 146.5 ( $\pm$ 5.5)                                 |
| <b><i>mdx</i></b>                             | 156.9 ( $\pm$ 4.7)                                 |
| <b><i>Cmah<sup>-/-</sup>mdx</i></b>           | 154.2 ( $\pm$ 9.9)                                 |
| <b><i>Cmah<sup>-/-</sup>mdx Pip6a-PMO</i></b> | 141.1 ( $\pm$ 6.8)                                 |
