# Supplementary material for: Peptide-conjugated phosphodiamidate oligomer-mediated exon skipping has benefits for cardiac function in mdx and Cmah-/-mdx mouse models of Duchenne muscular dystrophy
Source: PubMed Central journal article supplement (PMC6005479; doi:10.1371/journal.pone.0198897), 2018-06-18
Supplement: pone.0198897.s004.pdf [file pone.0198897.s004.pdf]

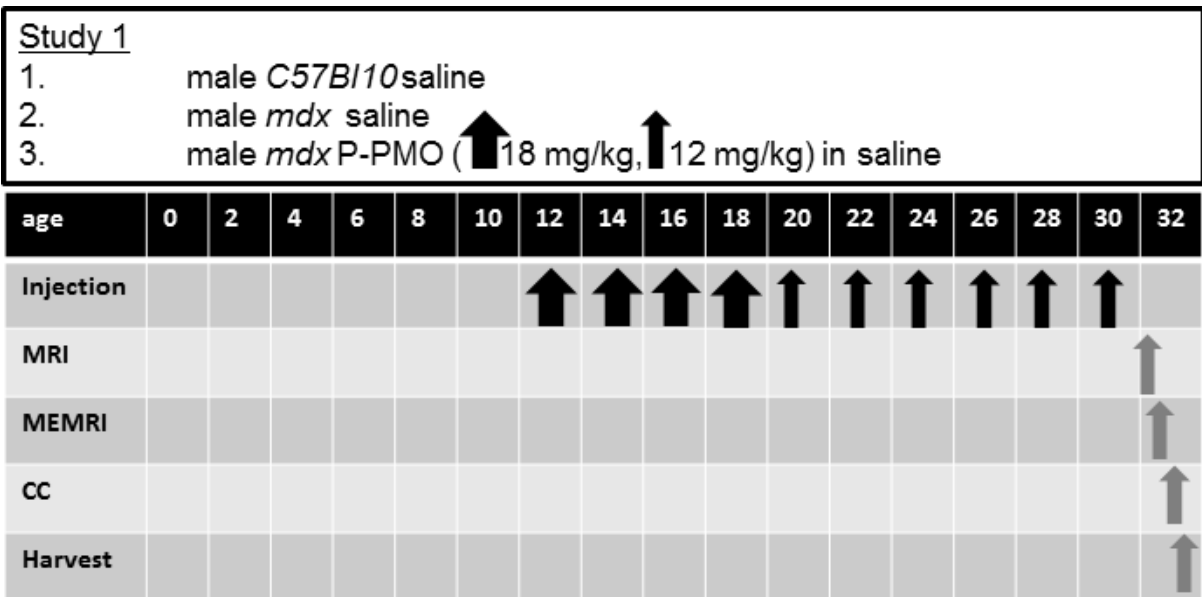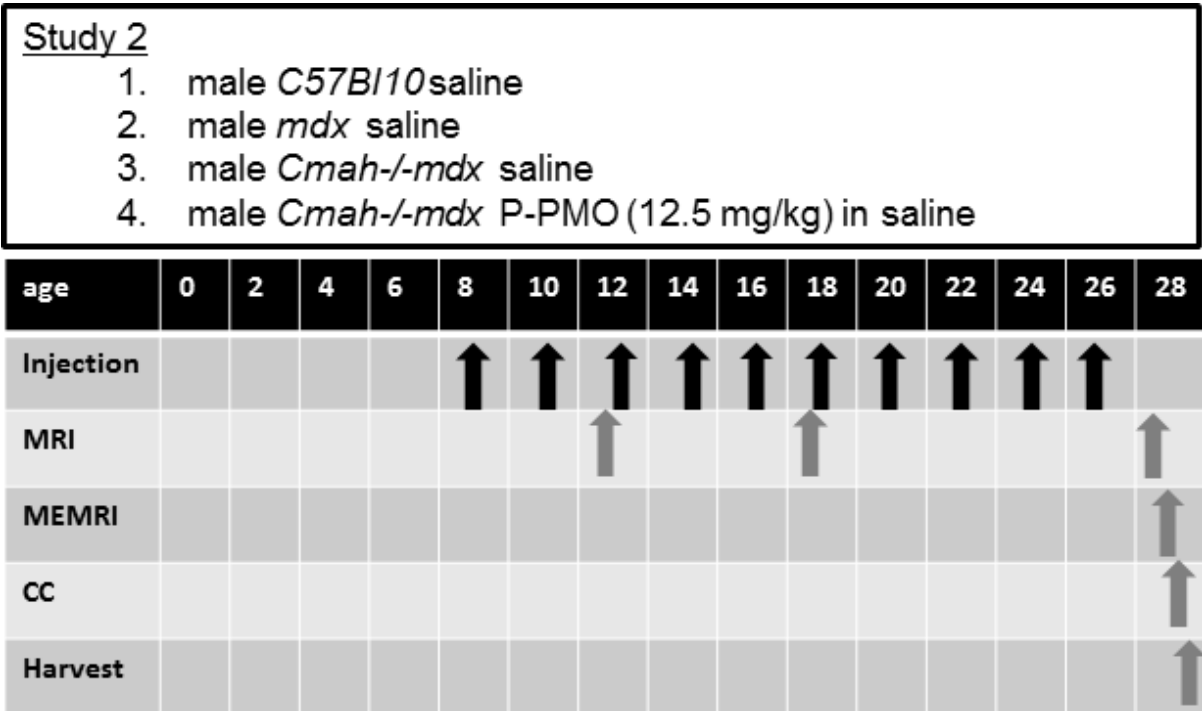

S1 Fig: Timelines outlining the protocol followed for the two studies.
