# Supplementary material for: Peptide-conjugated phosphodiamidate oligomer-mediated exon skipping has benefits for cardiac function in mdx and Cmah-/-mdx mouse models of Duchenne muscular dystrophy
Source: PubMed Central journal article supplement (PMC6005479; doi:10.1371/journal.pone.0198897), 2018-06-18
Supplement: pone.0198897.s005.pdf [file pone.0198897.s005.pdf]

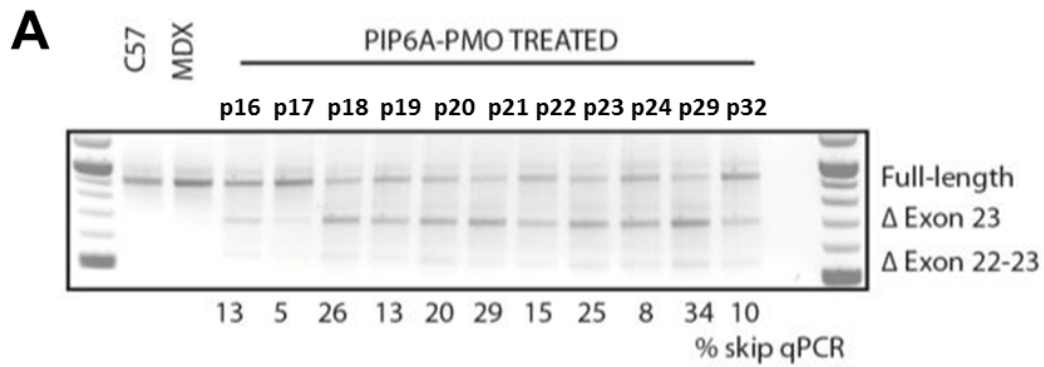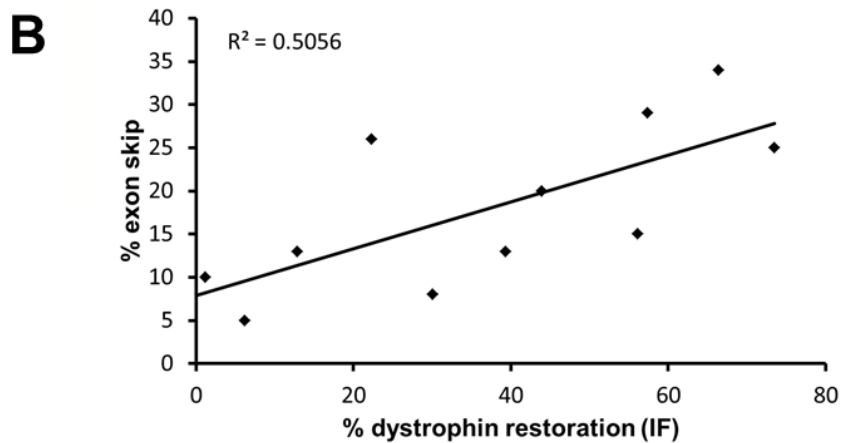

**S2 Fig: Relationship between exon skip and dystrophin restoration** A) Study 1 exon skip (RT-PCR) in Pip6A-PMO treated *mdx* mice. B) Significant correlation of exon skip with dystrophin restoration (quantified by IF), (Pearson Correlation (1-sided),  $p=0.0142$ ).
