# Supplementary material for: Peptide-conjugated phosphodiamidate oligomer-mediated exon skipping has benefits for cardiac function in mdx and Cmah-/-mdx mouse models of Duchenne muscular dystrophy
Source: PubMed Central journal article supplement (PMC6005479; doi:10.1371/journal.pone.0198897), 2018-06-18
Supplement: pone.0198897.s006.pdf [file pone.0198897.s006.pdf]

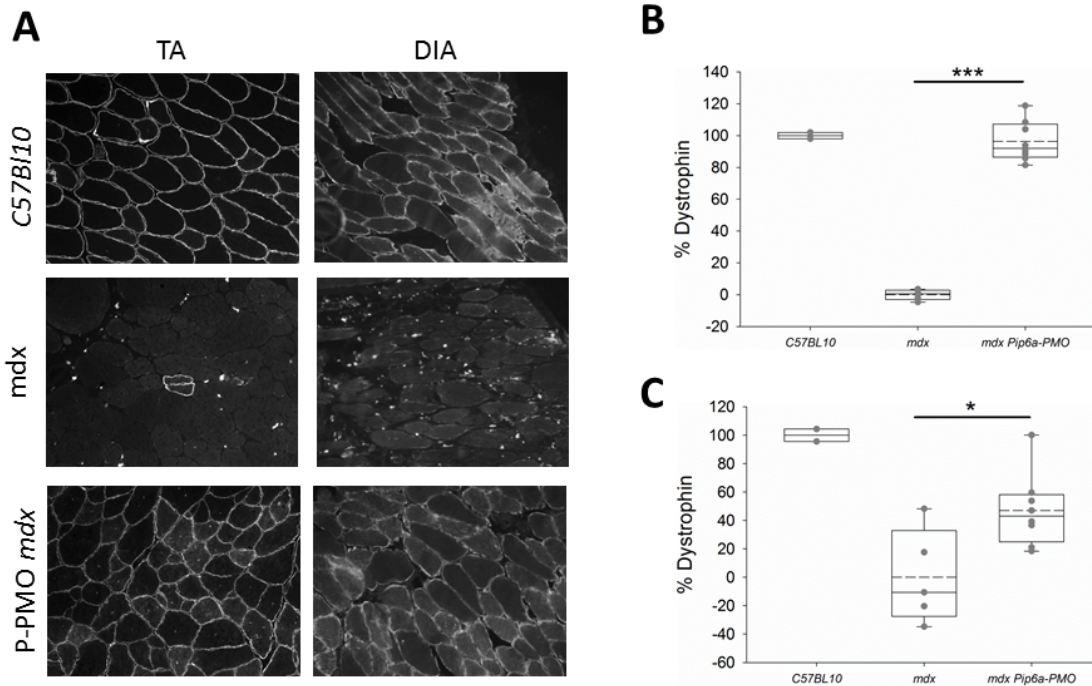

**S3 Fig: P-PMO treatment restores dystrophin to the tibialis anterior (TA) and diaphragm (DIA).** A) IF staining of dystrophin in TA and DIA. Quantification of dystrophin restoration on dystrophin/laminin IF in B) TA (*C57BL10* n=3, *mdx* n=6, *mdx* Pip6a-PMO n=8) and C) DIA (*C57BL10* n=2, *mdx*= 5, *mdx* Pip6a-PMO=8). Average dystrophin restoration was 96.35% and 47.02%, respectively (\*\**p*<0.001 and \**p*<0.05).
