# Supplementary material for: Peptide-conjugated phosphodiamidate oligomer-mediated exon skipping has benefits for cardiac function in mdx and Cmah-/-mdx mouse models of Duchenne muscular dystrophy
Source: PubMed Central journal article supplement (PMC6005479; doi:10.1371/journal.pone.0198897), 2018-06-18
Supplement: pone.0198897.s007.pdf [file pone.0198897.s007.pdf]

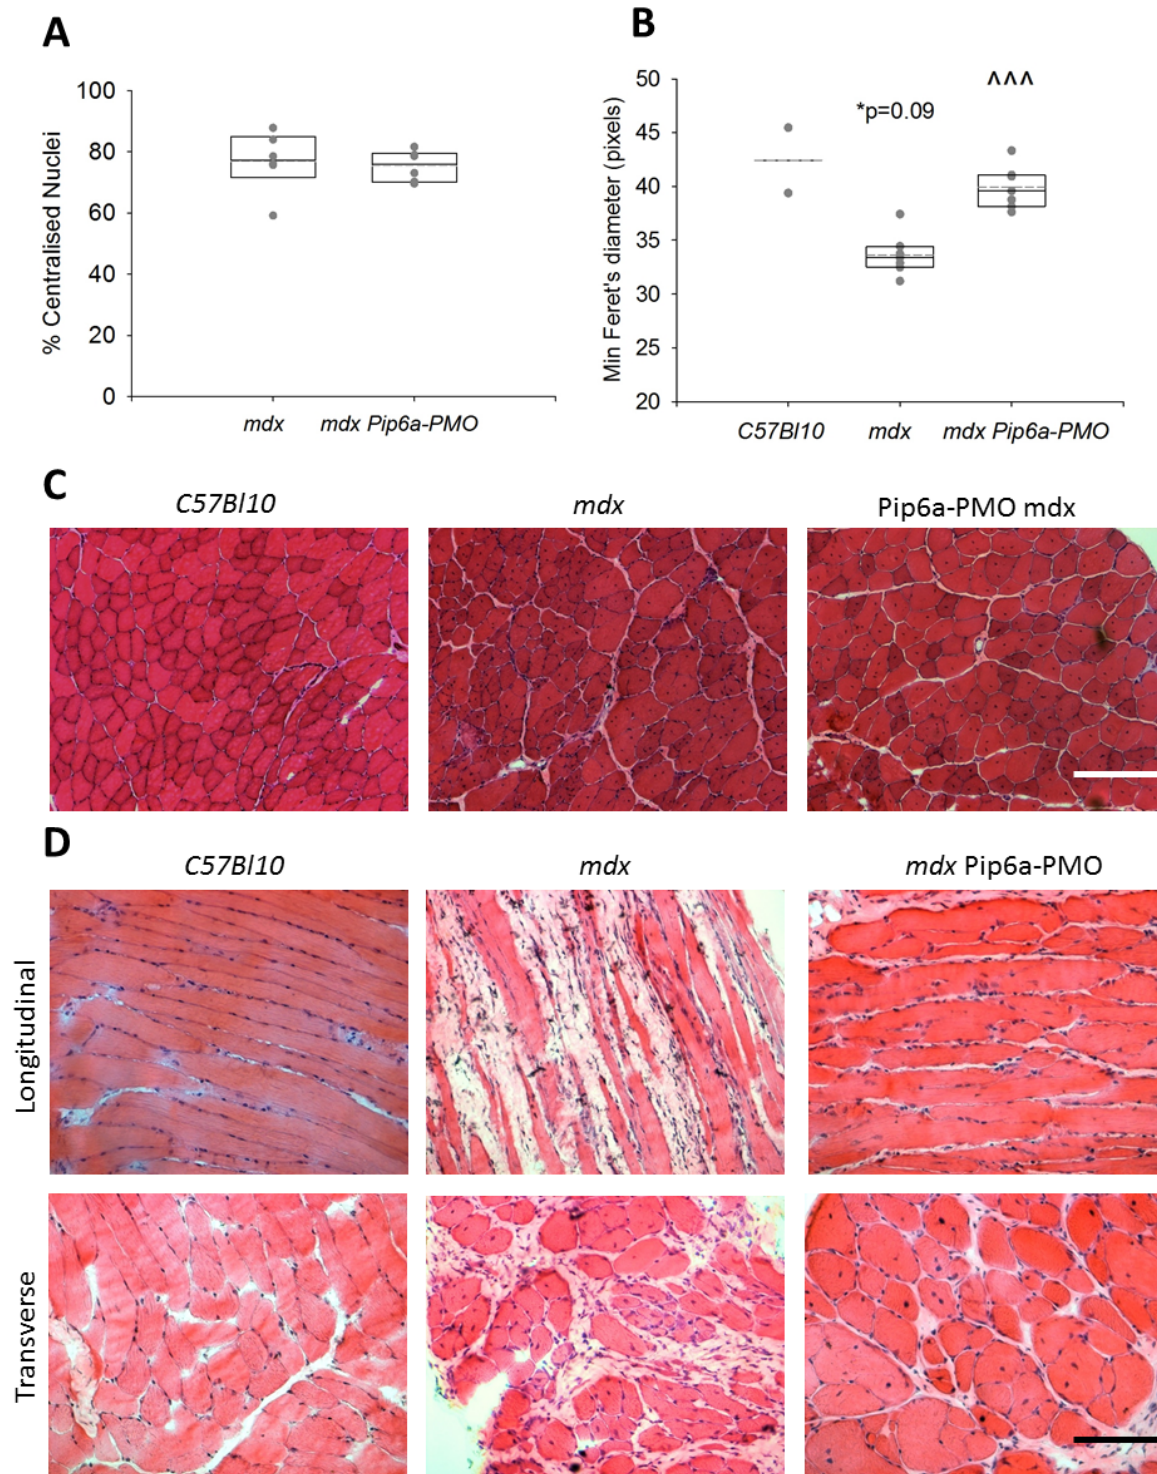

**S4 Fig: Effect of P-PMO treatment on pathology in tibialis anterior and diaphragm.** P-PMO has no significant effect on prevalence of A) centralised nuclei (quantified on H&E) ( $n=5/\text{group}$ ) but B-C) reduces fibre size heterogeneity and increases average fibre diameter in TA (quantified on laminin IF). (\*compared to *C57BL10*,  $^{\wedge\wedge\wedge}p<0.001$  compared to untreated *mdx*). (*C57BL10*  $n=2$ , *mdx* and *mdx Pip6a-PMO*  $n=6/\text{group}$ ). C) H&E section demonstrating a reduction in fibre size heterogeneity and reduced numbers of small diameter cells in P-PMO treated *mdx* mice. P-PMO treatment reduces diaphragm fibrosis in *mdx* mice. D) H&E stained transverse and longitudinal sections of diaphragm demonstrating a clear reduction in fibrosis with P-PMO treatment.
