# Supplementary material for: Peptide-conjugated phosphodiamidate oligomer-mediated exon skipping has benefits for cardiac function in mdx and Cmah-/-mdx mouse models of Duchenne muscular dystrophy
Source: PubMed Central journal article supplement (PMC6005479; doi:10.1371/journal.pone.0198897), 2018-06-18
Supplement: pone.0198897.s008.pdf [file pone.0198897.s008.pdf]

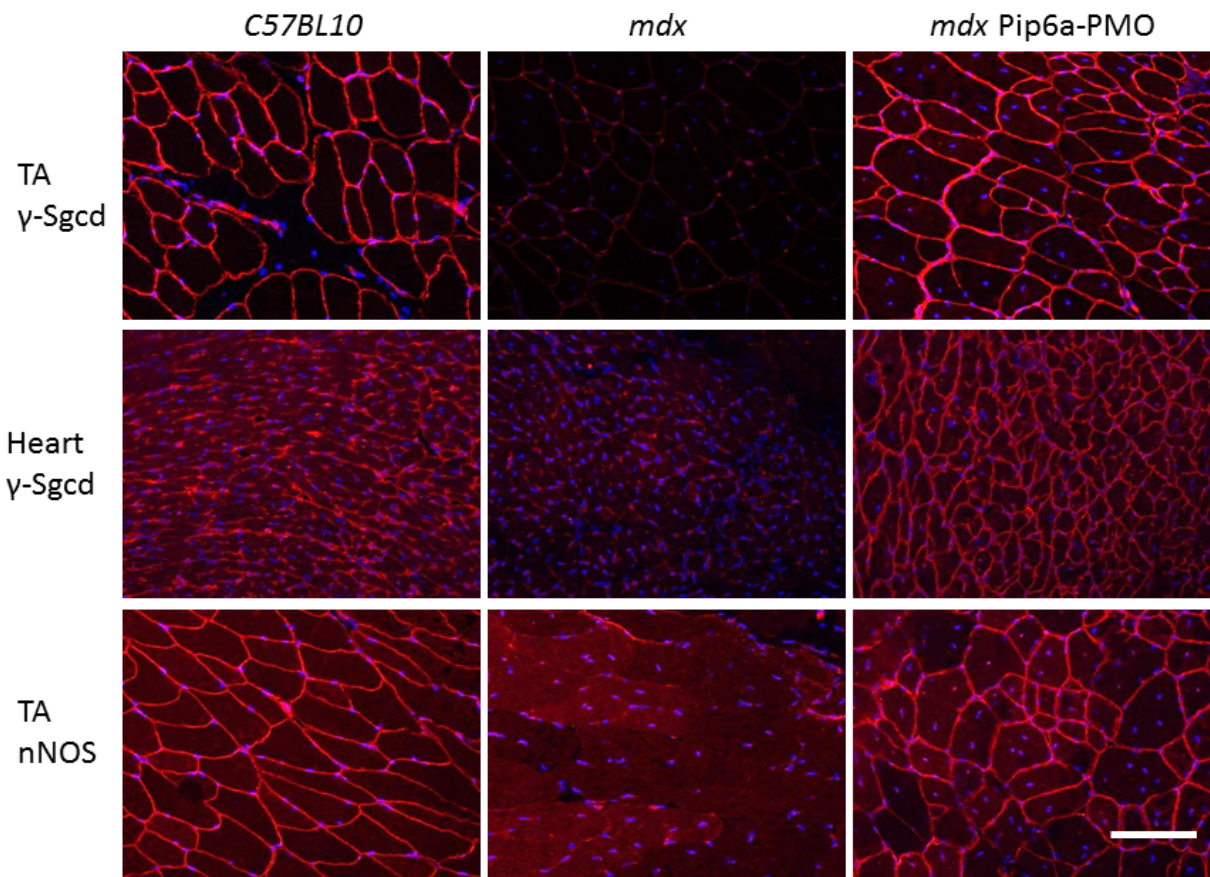

**S5 Fig: Effect of P-PMO treatment on nNOS and  $\gamma$ -Sgcd expression and localisation in *mdx* mice. Scale bar =100  $\mu$ m**
